# Supplementary material for: Mechanochromic properties in a mononuclear Cu(i) complex without cuprophilic interactions
Source: Royal Society of Chemistry journal article supplement (doi:10.1039/d1cc01229k), 2021-01-01
Supplement: d1cc01229k1.pdf [file d1cc01229k1.pdf]

## **Mechanochromic Properties in Mononuclear Cu(I) Complex without Cuprophilic Interaction**

Xiao Yu<sup>a</sup>, Xiaoyue Li<sup>b</sup>, Zelun Cai<sup>b</sup>, Lingzhi Sun<sup>a</sup>, Chengbo Wang<sup>b</sup>, Haixia Rao<sup>b</sup>, Chen Wei<sup>b</sup>,  
Zuqiang Bian<sup>b</sup>, Qionghua Jin<sup>a\*</sup> & Zhiwei Liu<sup>b\*</sup>

a. Department of Chemistry, Capital Normal University, Beijing, 100048, China

b. Beijing National Laboratory for Molecular Sciences (BNLMS), State Key Laboratory of Rare  
Earth Materials Chemistry and Applications, Beijing Engineering Technology Research Centre of  
Active Display, College of Chemistry and Molecular Engineering, Peking University, Beijing,  
100871, China

\*Corresponding Author(s): [jinqh@mail.cnu.edu.cn](mailto:jinqh@mail.cnu.edu.cn), [zwliu@pku.edu.cn](mailto:zwliu@pku.edu.cn)

## **General**

Without special declaration, all the reactions were performed in inert gas atmosphere using standard Schlenk techniques or glovebox. All reagents and solvents were commercially available with analytical grade. Tetrahydrofuran (THF) and diethyl ether (DEE) were pretreated with Na/NaH prior to use. CuBr used in this experiment also needs to be pretreated. <sup>[1]</sup> The <sup>1</sup>H and <sup>13</sup>C NMR spectra were measured by using Bruker ARX 400 MHz spectrometer and the <sup>31</sup>P NMR spectra were measured by AVANCE III 500 MHz spectrometer. Elemental analyses were performed on a VARIO EL analyzer (GmbH, Hanau, Germany). ESI mass spectra were performed using Bruker Solarix XR FTMS. UV-vis absorption spectra were recorded with Shimadzu UV-3600. Photoluminescence spectra and the decay lifetimes were recorded on an Edinburgh FLS920 instrument. The PLQYs were measured on Hamamatsu C9920 system with xenon lamp as excitation source. The infrared spectra were measured by a Tensor 27 Fourier transform infrared spectrometer (Bruker). Powder X-ray diffraction (PXRD) was performed on X-Pert3 Powder X-ray diffractometer. Single-crystal X-ray diffraction (XRD) data were collected on a Rigaku XtaLAB AFC12 diffractometer equipped with Cu-K $\alpha$  radiation ( $\lambda = 1.54184 \text{ \AA}$ ). The structures were resolved and refined using OLEX-2 <sup>[2]</sup> software integrated with Shelx2014 program. Theoretical simulations were performed using the Gaussian 09 <sup>[3]</sup> program packages and produced by CAM-B3LYP <sup>[4]</sup>. The model for calculation was extracted from single crystals.

## **Synthesis**

### **Potassium bis(pyrazol-1-yl)borohydrate (Kpz<sub>2</sub>BH<sub>2</sub>) <sup>[5]</sup>**

Under N<sub>2</sub> atmosphere, a mixture of pyrazole (20.0 g, 290 mmol) and potassium borohydride (4.0 g, 74 mmol) was heated at 110 °C with stirring in a 100 mL round-bottom flask connected with spherical condenser tube. After 10 hours, 50 mL toluene was added slowly to the melt. The precipitate was filtered, washed with hot toluene and hexane, and dried under vacuum at 70 °C for 3 hours. Then 7.6 g (41 mmol) white solid was obtained (yield, 55%). <sup>1</sup>H NMR (400 MHz, DMSO-*d*<sub>6</sub>)  $\delta = 7.34$  (d, 2H), 7.23 (d,

2H), 5.93 (t, 2H), 2.95-4.03 (br, 2H).

### **3,4-bis(diphenylphosphino)thiophene (3,4-dppTp)** [6]

3,4-Dibromothiophene (5.00 g, 20.7 mmol) was stirred in diethyl ether (15 mL) and the mixture was cooled to -78 °C. Then n-BuLi (10 mL, 2.4 M in n-hexane) was slowly added and the yellow mixture was stirred for 3 hours at -78 °C. Then, chlorodiphenylphosphine (Ph<sub>2</sub>PCL, 4.56 g, 20.7 mmol) was added dropwise and the mixture was stirred at -78 °C for 1 hour, naturally warmed to room temperature and stirred for another 4 hours. Then the mixture was cooled to -78 °C and n-BuLi (10 mL, 2.4 M in n-hexane) was slowly added again and the brown mixture was stirred for 3 hours at -78 °C. Then PPh<sub>2</sub>Cl (4.56 g, 20.7 mmol) was added slowly and the mixture was stirred at -78 °C for 1 hour. After then, the mixture was naturally warmed up to room temperature and stirred overnight. On the second day, 20 mL distilled water was added to quench the reaction. The salts were removed by extraction with CH<sub>2</sub>Cl<sub>2</sub> (3 × 60 mL) and the organic phase was concentrated under reduced pressure. The brown gelatinous was further purified by sublimation to obtain 4.56 g (10.1 mmol) yellow solid (yield, 49%). <sup>1</sup>H NMR (400 MHz, DMSO-*d*<sub>6</sub>) δ = 7.24 (m, 20H), 7.10 (m, 2H); <sup>13</sup>C NMR (101 MHz, CD<sub>2</sub>Cl<sub>2</sub>) δ=141.45, 137.09 (t, *J* = 3.7 Hz), 133.53 (t, *J* = 10.1 Hz), 132.53, 128.63, 128.34 (t, *J* = 3.6 Hz).

### **Cu<sub>2</sub>Br<sub>2</sub>(3,4-dppTp)<sub>2</sub>** [7]

CuBr (0.34 g, 2.35 mmol) and 3,4-dppTp (1.09 g, 2.41 mmol) were added to 30 mL toluene and stirred for 10 hours at room temperature. The resulting yellow precipitate was filtered off, washed with toluene and acetonitrile, and dried under vacuum at 60 °C for 3 hours. Finally, 1.12 g (0.94 mmol) yellow solid was obtained (yield, 80%). <sup>1</sup>H NMR (400 MHz, DMSO-*d*<sub>6</sub>) δ = 7.80 (s, 4H) 7.39 (m, 40H).

### **Cu[(3,4-dppTp)(pz<sub>2</sub>BH<sub>2</sub>)] (1)**

Kpz<sub>2</sub>BH<sub>2</sub> (0.20 g, 1.07 mmol) and Cu<sub>2</sub>Br<sub>2</sub>(3,4-dppTp)<sub>2</sub> (0.51 g, 0.43 mmol) were mixed and stirred in 35 mL THF at room temperature for 12 hours, and then the mixture was concentrated under reduced pressure. The resulting solid was dissolved in CH<sub>2</sub>Cl<sub>2</sub>

and passed through a short column with neutral aluminum oxide. The obtained yellow solution was concentrated to about 3 mL under reduced pressure and then was added 20 mL methanol. The resulting precipitate was collected and dried under reduced pressure to give 0.47 g (0.71 mmol, yield 83%) of the title complex as a white powder.  $^1\text{H}$  NMR (400 MHz,  $\text{DMSO-}d_6$ )  $\delta$  = 8.02 (t, 2H), 7.59 (d, 2H), 7.34 (m, 20H), 6.86 (d, 2H), 6.05 (t, 2H), 3.35-3.78 (br, 2H).  $^{13}\text{C}$  NMR (101 MHz,  $\text{CDCl}_3$ )  $\delta$  = 139.05, 133.51, 133.48, 131.87, 131.78, 131.70, 131.25, 128.23, 127.44, 127.40, 127.35, 102.02, 76.23.  $^{31}\text{P}$  NMR (202 MHz,  $\text{CDCl}_3$ ),  $\delta$  = -24.63. Anal. Calc. For  $\text{C}_{34}\text{H}_{30}\text{BN}_4\text{P}_2\text{SCu}$ : C, 61.59%, H, 4.56%, N, 8.45%. Found: C, 61.04%, H, 4.56%, N, 8.36%. MS (ESI):  $m/z$  calculated for  $\text{C}_{34}\text{H}_{30}\text{BN}_4\text{P}_2\text{SCu}$ : 663.0, found: 663.1.

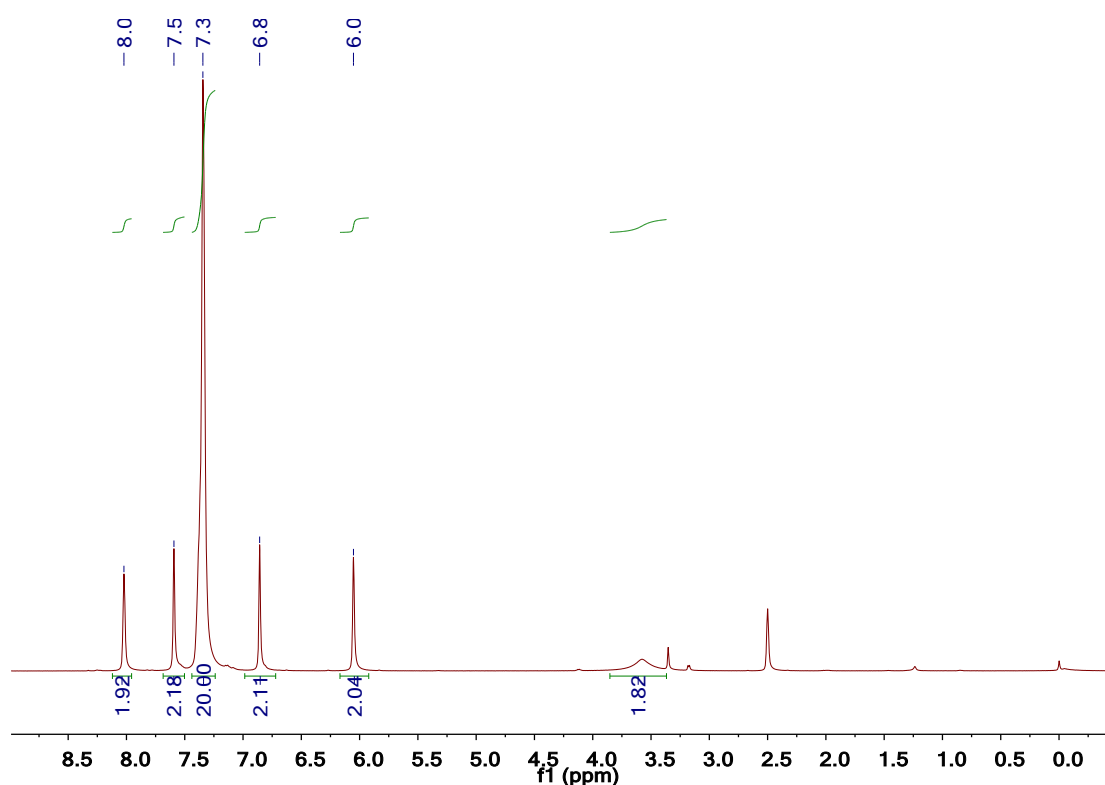

**Fig. S1.**  $^1\text{H}$  NMR spectrum of  $\text{Cu}[(3,4\text{-dppTp})(\text{pz}_2\text{BH}_2)]$  at room temperature.

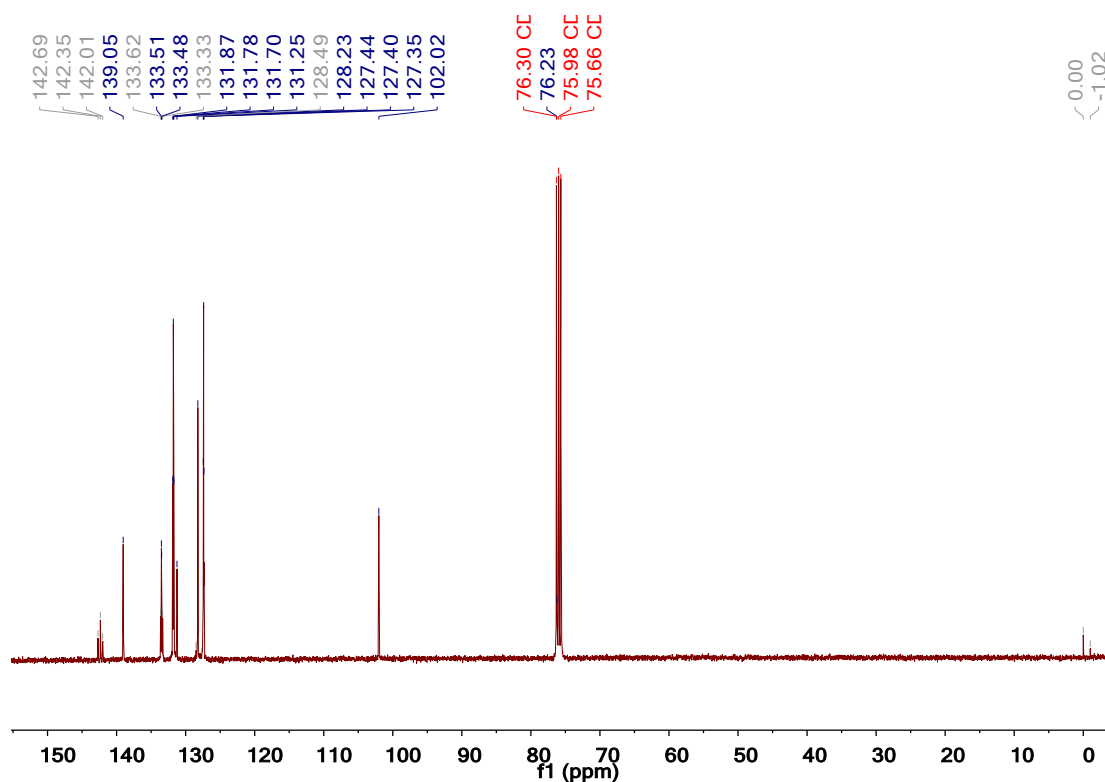

**Fig. S2.**  $^{13}\text{C}$  NMR spectrum of  $\text{Cu}[(3,4\text{-dppTp})(\text{pz}_2\text{BH}_2)]$  at room temperature.

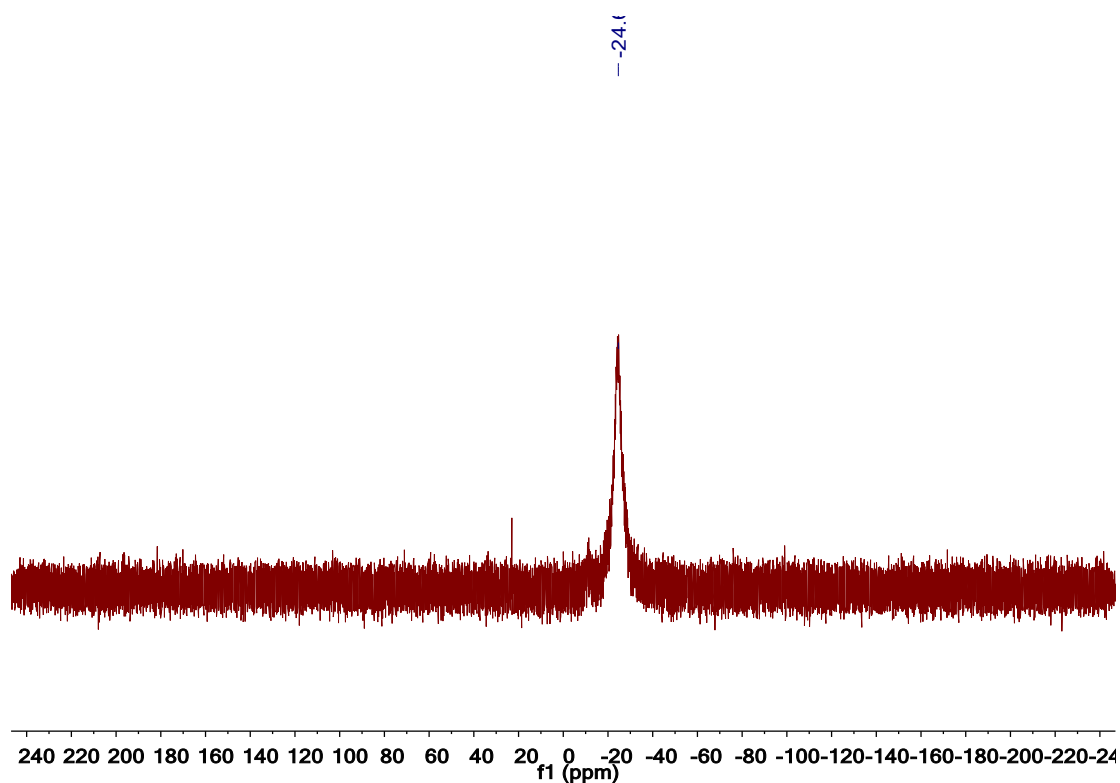

**Fig. S3.**  $^{31}\text{P}$  NMR spectrum of  $\text{Cu}[(3,4\text{-dppTp})(\text{pz}_2\text{BH}_2)]$  at room temperature.

## Peking University Mass Spectrometry Analysis Report

### Analysis Info

Analysis Name FTMS-18010325\_Pos\_20180201\_000001.d  
Sample 20180131-2  
Comment

Acquisition Date 2/1/2018 9:34:48 AM  
Instrument Bruker Solarix XR FTMS  
Operator Peking University

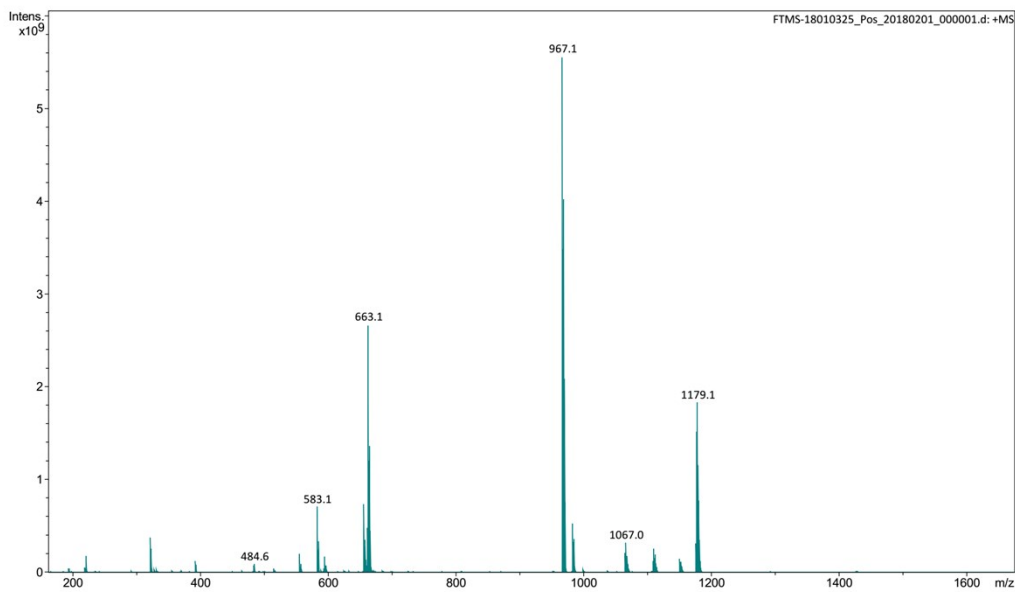

Bruker Compass DataAnalysis 4.4

printed: 2/1/2018 9:35:12 AM

Page 1 of 1

**Fig. S4.** ESI mass spectra of complex **1**. The peak with  $m/z$  of 967.1 is a new complex  $\text{Cu}(3,4\text{-dppTp})_2^+$  which is generated in the test.

## Crystal Growth

Generally, Slow crystallization of **1** from the CH<sub>3</sub>OH/CH<sub>2</sub>Cl<sub>2</sub> (1:1) solution generated two colorless polymorphs with blue (**1B**) and yellow (**1Y**) luminescence under UV radiation.

Complex **1** (50 mg) was dissolved in 8 mL of CH<sub>2</sub>Cl<sub>2</sub> in a vial and 8 mL of CH<sub>3</sub>OH was added, Sonicate for 1 min, and then filtered it in a vial. After slowly volatilized for 5 days, **1B** and **1Y** obtained. They can be easily separated upon irradiation with a 365 nm lamp. In this way, pure **1B** and **1Y** crystals can be obtained for testing.

In addition, **1B** can selective formation by the following method. In a vial, 700 mg of complex **1** was dissolved in 7 mL of dichloromethane, and then 15 ml of methanol was added, sonicated for 1 min, a large amount of white precipitate would be precipitated, so that a large amount of **1B** could be obtained.

As shown in the Fig. S4, the PXRD diffraction peaks of the selectively formed **1B** sample are consistent with the **1B** sample obtained by slow crystallization.

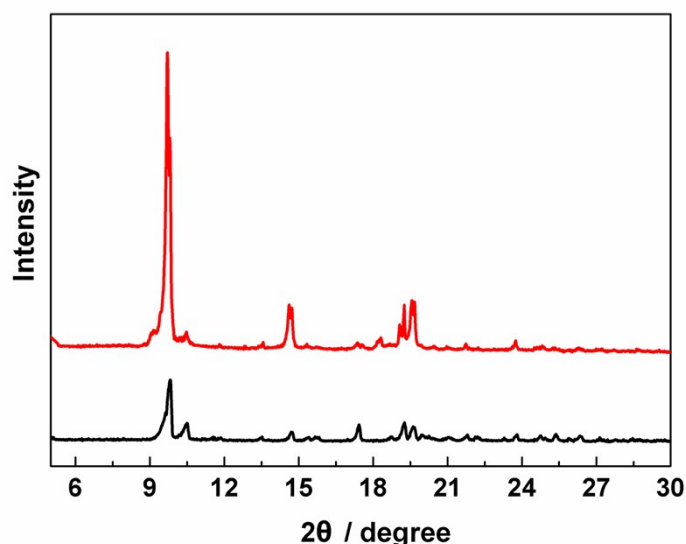

**Fig. S5.** PXRD patterns of selectively formed **1B** sample (black) and Slowly crystallized **1B** sample (red).

## Mechanochromic Luminescence

The as-synthesized **1B** is colorless and transparent crystals (the selectively formed **1B** is white powder crystals). In a mortar, **1B** will become yellow powder **1G** after grinding. This transition will be completed in a short time, and UV lamps can be used to monitor whether **1B** has completely changed to **1G**.

After grinding, place the mortar containing the **1G** sample in a clean glass tank, and add a small amount of dichloromethane (or diethyl ether) to the tank. Cover the tank with a lid and let the dichloromethane (or diethyl ether) vapor fumigate the **1G** sample. After 5 minutes, open the lid, and the **1G** sample turned back to white powder. These white powders are samples of **1G-F1** (**1G-F2**).

Add a few drops of diethyl ether to the **1G** sample. After the diethyl ether evaporates, a white powder, **1G-S**, is obtained.

The preparation method of **1-Film** as follows: The solutions of complex **1** (10 mg/mL in chloroform) were spin-coated on ultrasonic cleaned quartz wafer at a speed of 2000 rpm for 60 s to form the neat film.

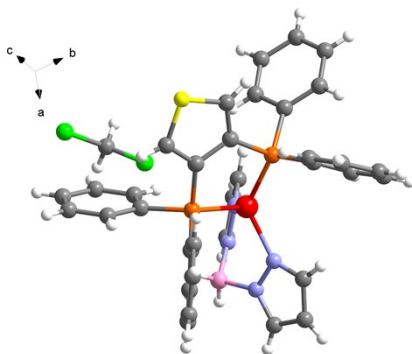

**Fig. S6.** Crystallographically derived molecular structures of **1B**. Color code: B (pink), C (grey), Cl (green), Cu (red), H (white), N (blue), P (orange), S (yellow).

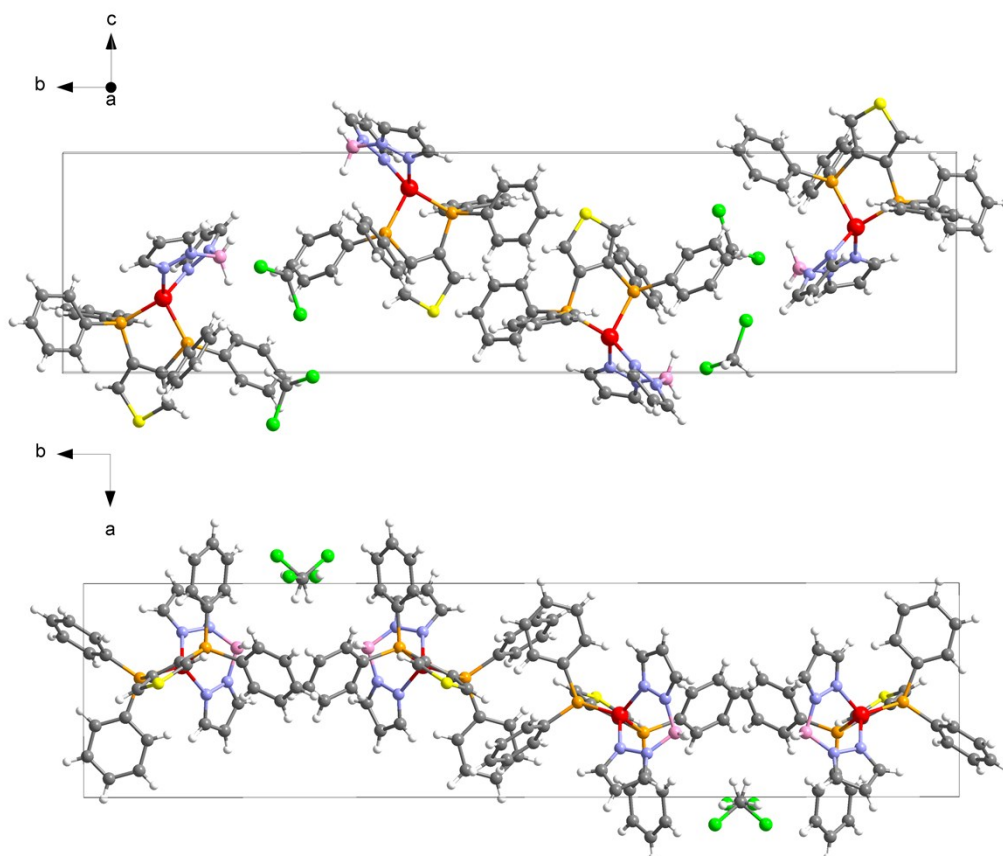

**Fig. S7.** Unit cell of **1B** shown along the a axis (top) and c axis (bottom).



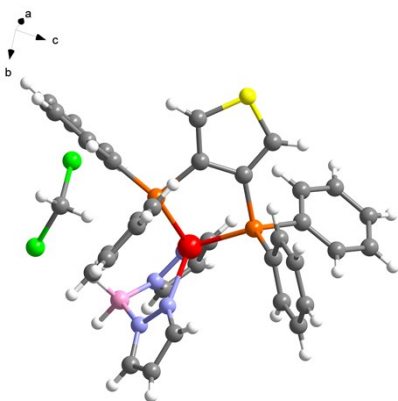

**Fig. S8.** Crystallographically derived molecular structures of **1Y**.

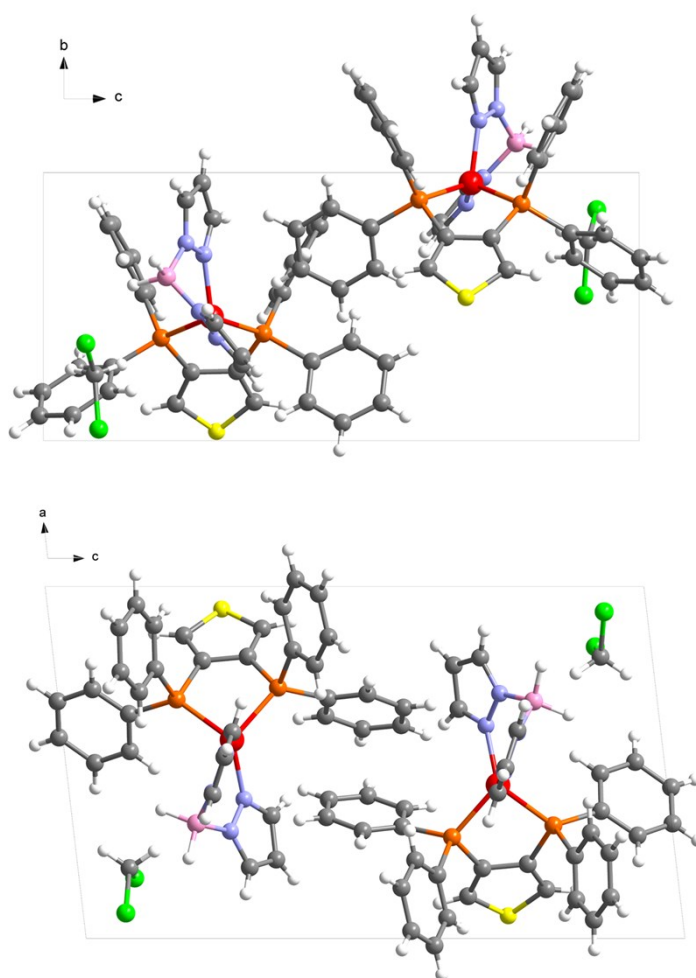

**Fig. S9.** Unit cell of **1Y** shown along the a axis (top) and b axis (bottom).

**Table S1.** Summary of crystallographic data of the two crystal forms.

| identification code | <b>1B</b>                    | <b>1Y</b>                    |
|---------------------|------------------------------|------------------------------|
| Empirical formula   | $C_{35}H_{32}BCl_2CuN_4P_2S$ | $C_{35}H_{32}BCl_2CuN_4P_2S$ |
| Formula weight      | 747.89                       | 747.89                       |

|                                                |                                                                  |                                                                  |
|------------------------------------------------|------------------------------------------------------------------|------------------------------------------------------------------|
| Temperature/K                                  | 172.99(10)                                                       | 173                                                              |
| Crystal system                                 | monoclinic                                                       | monoclinic                                                       |
| Space group                                    | P2 <sub>1</sub> /c                                               | P2 <sub>1</sub>                                                  |
| a/Å                                            | 9.4427(2)                                                        | 11.20173(11)                                                     |
| b/Å                                            | 38.5575(6)                                                       | 8.45092(9)                                                       |
| c/Å                                            | 9.5037(2)                                                        | 18.9038(2)                                                       |
| $\alpha$ /°                                    | 90                                                               | 90                                                               |
| $\beta$ /°                                     | 94.951(2)                                                        | 96.6573(10)                                                      |
| $\gamma$ /°                                    | 90                                                               | 90                                                               |
| Volume/Å <sup>3</sup>                          | 3447.26(12)                                                      | 1777.46(3)                                                       |
| Z                                              | 4                                                                | 2                                                                |
| $\rho_{\text{calc}}$ /cm <sup>3</sup>          | 1.441                                                            | 1.397                                                            |
| $\mu$ /mm <sup>-1</sup>                        | 4.013                                                            | 3.891                                                            |
| F(000)                                         | 1536.0                                                           | 768.0                                                            |
| Crystal size/mm <sup>3</sup>                   | 0.25 × 0.2 × 0.2                                                 | 0.2 × 0.2 × 0.2                                                  |
| Radiation                                      | CuK $\alpha$ ( $\lambda$ = 1.54184)                              | CuK $\alpha$ ( $\lambda$ = 1.54184)                              |
| 2 $\theta$ range for data collection/°         | 9.174 to 147.306                                                 | 7.946 to 147.356                                                 |
| Index ranges                                   | -11 ≤ h ≤ 10, -45 ≤ k ≤ 46,<br>-11 ≤ l ≤ 11                      | -13 ≤ h ≤ 13, -10 ≤ k ≤ 10,<br>-22 ≤ l ≤ 23                      |
| Reflections collected                          | 13817                                                            | 11330                                                            |
| Independent reflections                        | 6349 [R <sub>int</sub> = 0.0411,<br>R <sub>sigma</sub> = 0.0420] | 5841 [R <sub>int</sub> = 0.0260,<br>R <sub>sigma</sub> = 0.0363] |
| Data/restraints/parameters                     | 6349/19/423                                                      | 5841/608/423                                                     |
| Goodness-of-fit on F <sup>2</sup>              | 1.064                                                            | 1.035                                                            |
| Final R indexes [I ≥ 2 $\sigma$<br>(I)]        | R <sub>1</sub> = 0.0727, wR <sub>2</sub> =<br>0.2125             | R <sub>1</sub> = 0.0509, wR <sub>2</sub> =<br>0.1366             |
| Final R indexes [all data]                     | R <sub>1</sub> = 0.0765, wR <sub>2</sub> =<br>0.2166             | R <sub>1</sub> = 0.0517, wR <sub>2</sub> =<br>0.1377             |
| Largest diff. peak/hole / e<br>Å <sup>-3</sup> | 1.08/-1.84                                                       | 0.62/-0.81                                                       |
| Flack parameter                                |                                                                  | 0.02(3)                                                          |

**Table S2.** The selected bond distances and angles around Cu atoms of two crystals.

|              | <b>1B</b>  | <b>1Y</b>  |
|--------------|------------|------------|
| Cu-P1 (Å)    | 2.2355(10) | 2.2585(13) |
| Cu-P2 (Å)    | 2.2964(11) | 2.2642(12) |
| Cu-N1 (Å)    | 2.035(3)   | 2.023(4)   |
| Cu-N2 (Å)    | 2.020(3)   | 2.023(5)   |
| P1-Cu-P2 (°) | 92.18(4)   | 90.97(5)   |
| N1-Cu-N2 (°) | 93.15(14)  | 97.54(19)  |
| P1-Cu-N1 (°) | 122.79(10) | 118.89(12) |
| P1-Cu-N2 (°) | 124.33(9)  | 116.39(12) |

|                    |            |            |
|--------------------|------------|------------|
| P2-Cu-N1 (°)       | 109.55(10) | 125.15(13) |
| P2-Cu-N2 (°)       | 115.89(10) | 109.14(13) |
| Dihedral angle (°) | 87.26(9)   | 84.36(10)  |

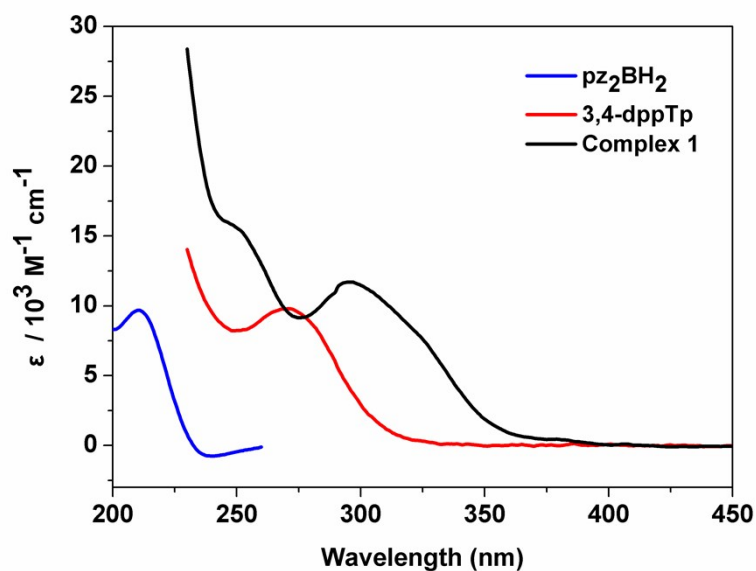

**Fig. S10.** Absorption spectra of the complex **1** and free ligands measured at ambient temperature. Spectra of **1** and the 3,4-dppTp ligand were recorded in dichloromethane ( $c \approx 2 \times 10^{-5}$  M).  $Kpz_2BH_2$  was measured in an acetonitrile solution.

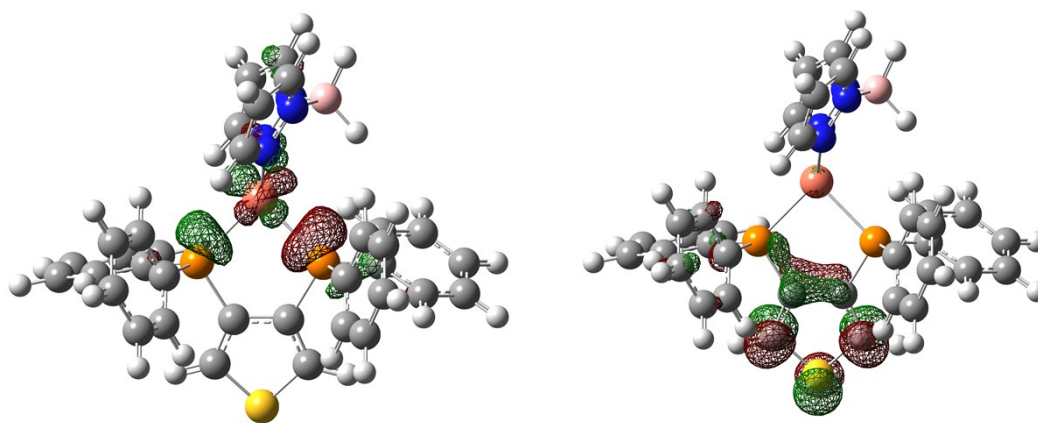

**Fig. S11.** DFT calculated HOMO (left) and LUMO (right) diagrams of the complex **1**.

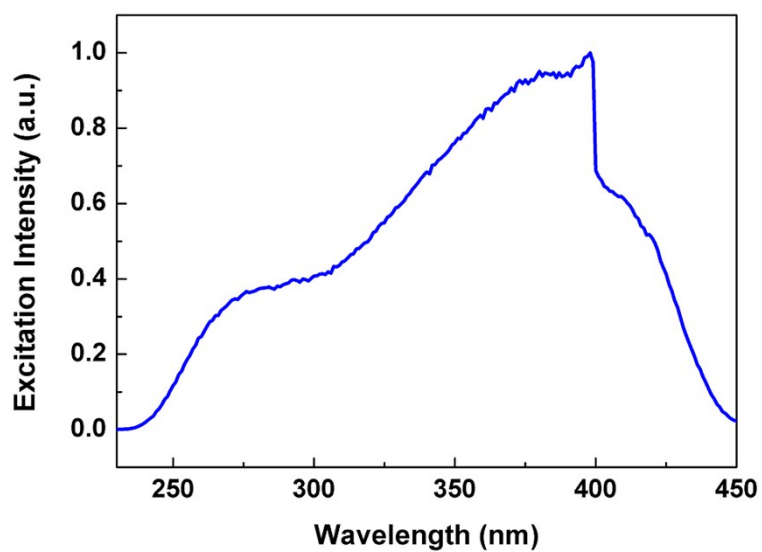

**Fig. S12.** Excitation of crystal **1B** at ambient temperature.

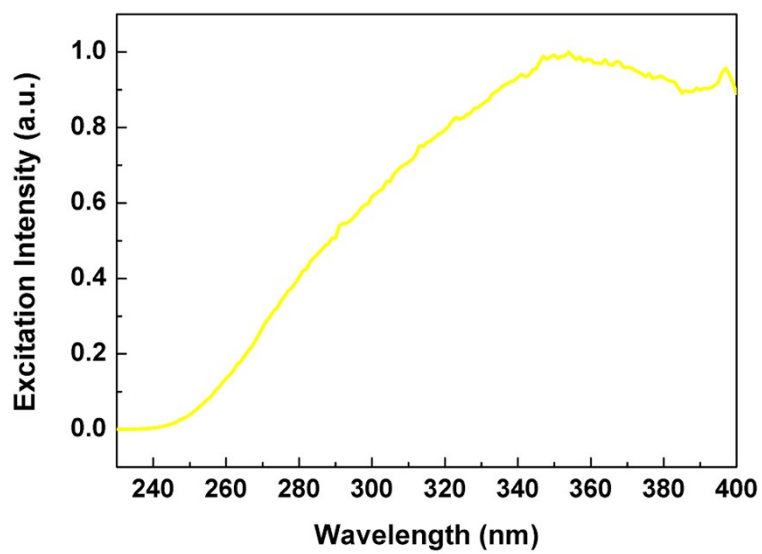

**Fig. S13.** Excitation of crystal **1Y** at ambient temperature.

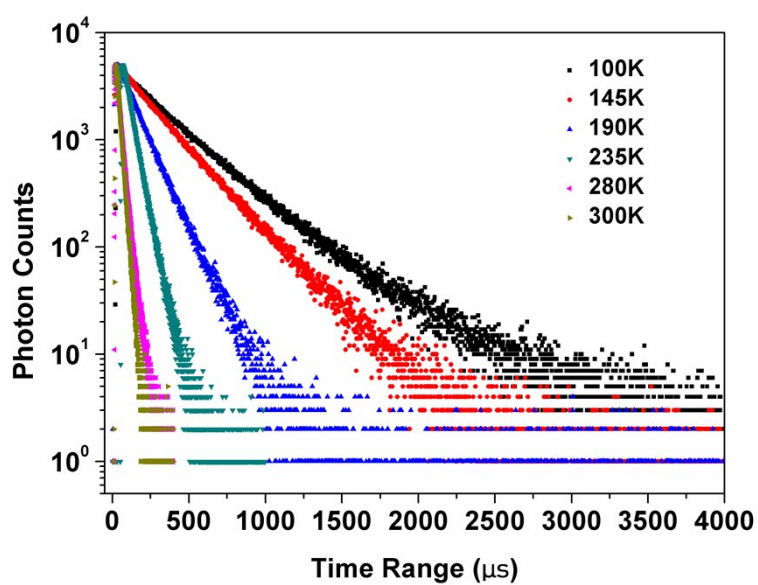

**Fig. S14.** Temperature dependent photoluminescence spectra of **1B**.

**Table S3.** Detailed temperature dependent excited state lifetime values of **1B** and **1Y** crystals.

|      | <b>1B</b> | <b>1Y</b> |
|------|-----------|-----------|
| 77K  | 207.70    | 336.54    |
| 85K  | 207.84    | 371.72    |
| 100K | 198.96    | 335.36    |
| 115K | 191.93    | 333.99    |
| 130K | 182.04    | 308.18    |
| 145K | 157.60    | 298.07    |
| 160K | 142.50    | 242.45    |
| 175K | 130.24    | 175.98    |
| 190K | 102.97    | 130.52    |
| 205K | 73.19     | 92.07     |
| 220K | 47.82     | 67.74     |
| 235K | 42.86     | 49.35     |
| 250K | 37.29     | 44.00     |
| 265K | 33.63     | 33.56     |
| 280K | 28.85     | 27.48     |
| 300K | 23.09     | 21.59     |

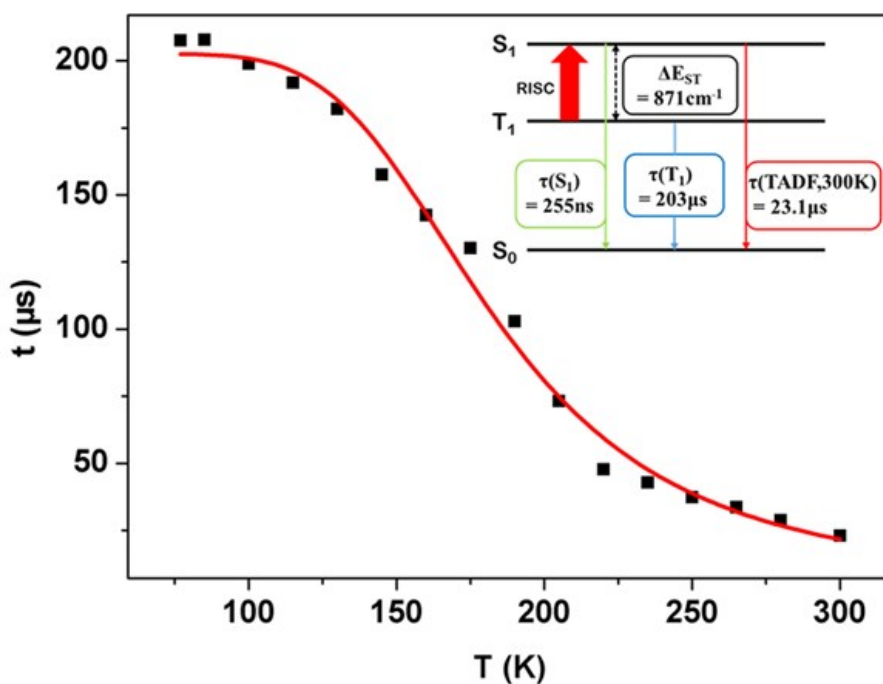

**Fig. S15.** Temperature-dependent emission lifetimes of **1B**. The solid line is a fit curve according to literature.<sup>8</sup> Insert: Energy levels for ground state and lowest excited state of **1B**, in which  $\tau(S_1)$ ,  $\tau(T_1)$ ,  $\tau(\text{TADF})$ , RISC, and  $\Delta E_{ST}$  represent prompt fluorescence decay time, phosphorescence decay time, delayed fluorescence decay time, reverse intersystem crossing, and the energy gap between the  $S_1$  state and  $T_1$  state.

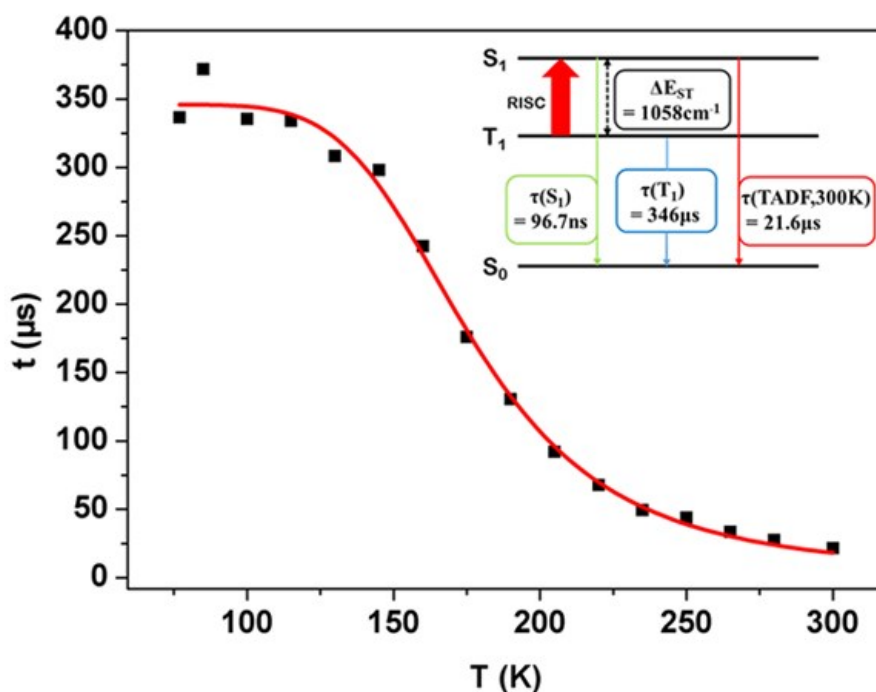

**Fig. S16.** Temperature-dependent emission lifetimes of **1Y**.

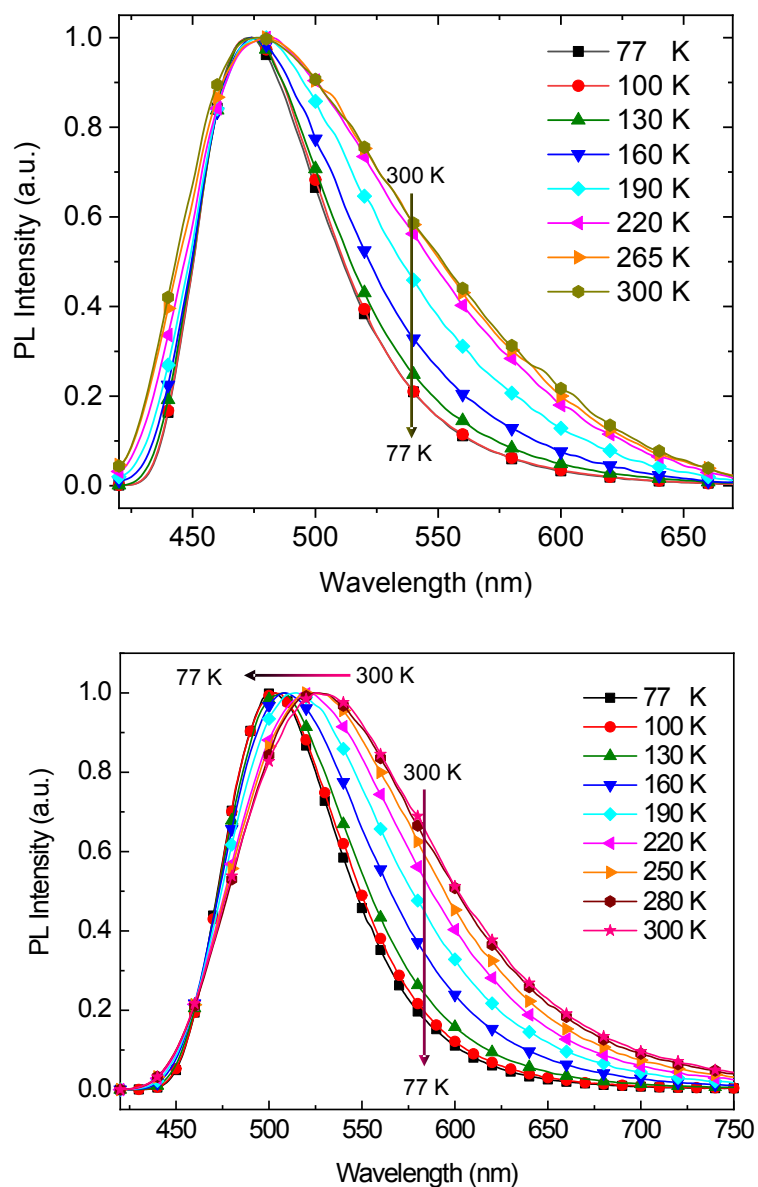

**Fig. S17.** Temperature dependent photoluminescence spectra of **1B** (top) and **1Y** (bottom). The excitation wavelength of **1B** is 400 nm. The excitation wavelength of **1Y** is 340 nm.

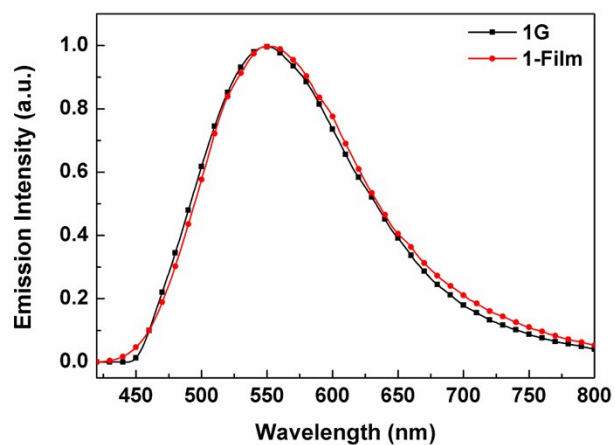

**Fig. S18.** Photoluminescence spectra comparison of **1G** and **1-Film**.

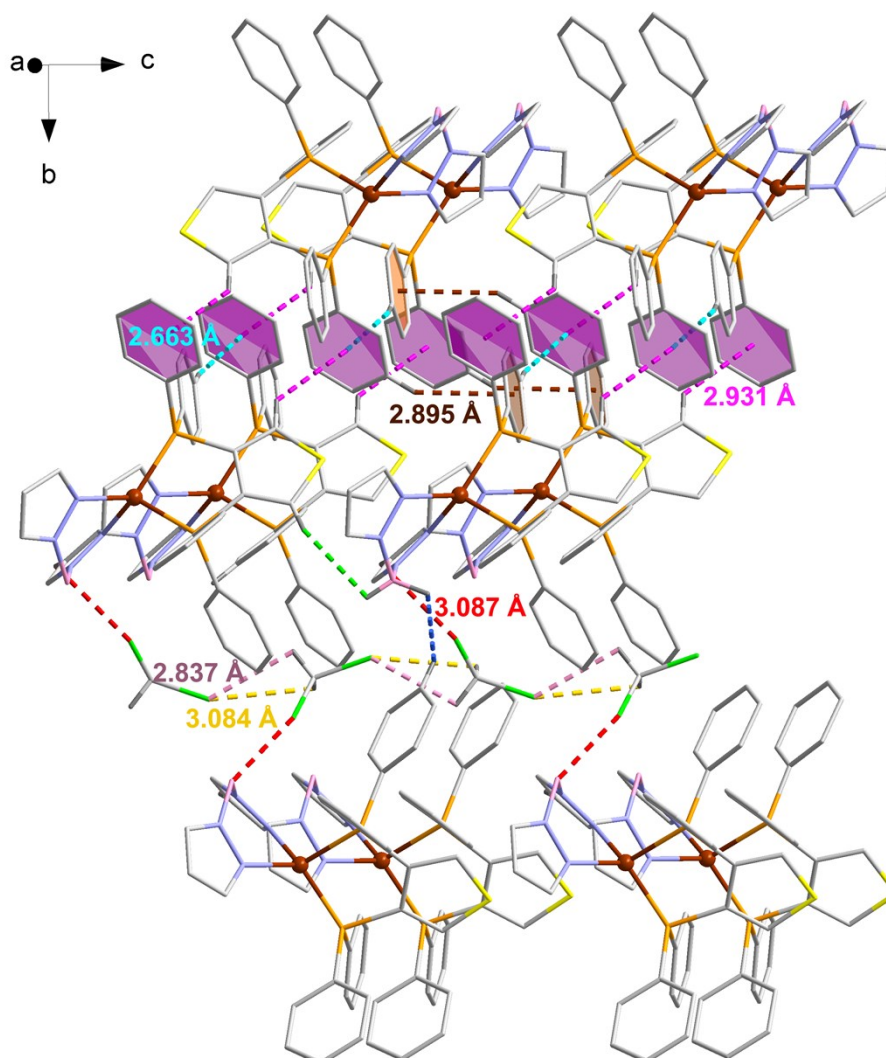

**Fig. S19.** Illustration of rich intermolecular forces in **1B**, including C-H $\cdots$  $\pi$  bonds (2.931, 2.663, and 2.895 Å), and C-H $\cdots$ Cl bonds (2.837, 3.084, and 3.087 Å).



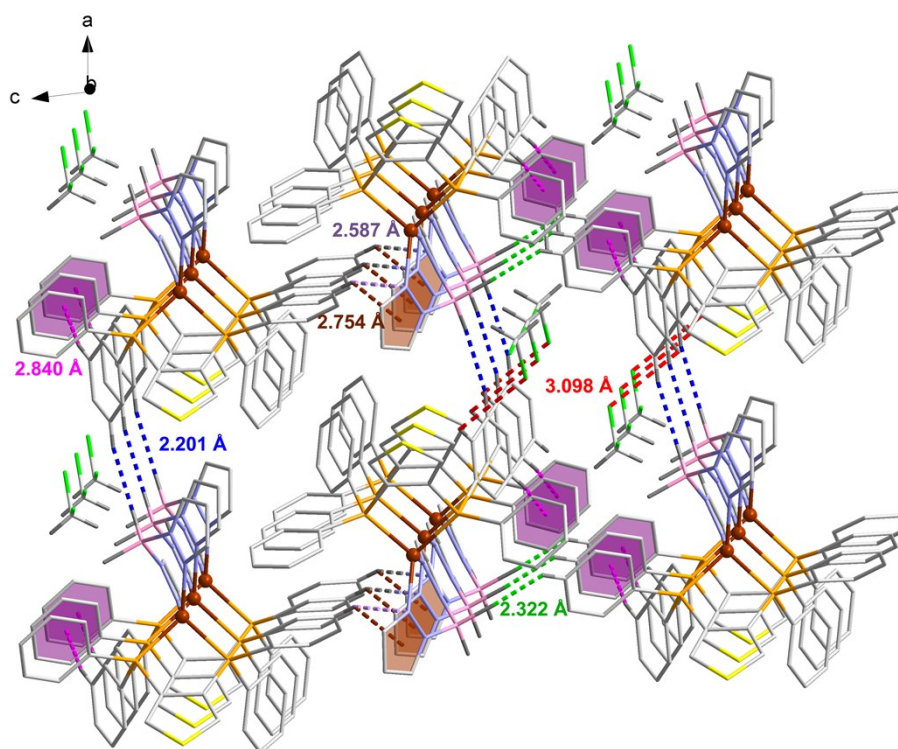

**Fig. S20.** Illustration of rich intermolecular forces in **1Y**, including C-H $\cdots$  $\pi$  bonds (2.754 and 2.840 Å), B-H $\cdots$ H-C dihydrogen bonds (2.201 Å, 167.90° and 2.322 Å, 176.13°), C-H $\cdots$ Cl bond (3.098 Å), and C-H $\cdots$ N bond (2.587 Å).

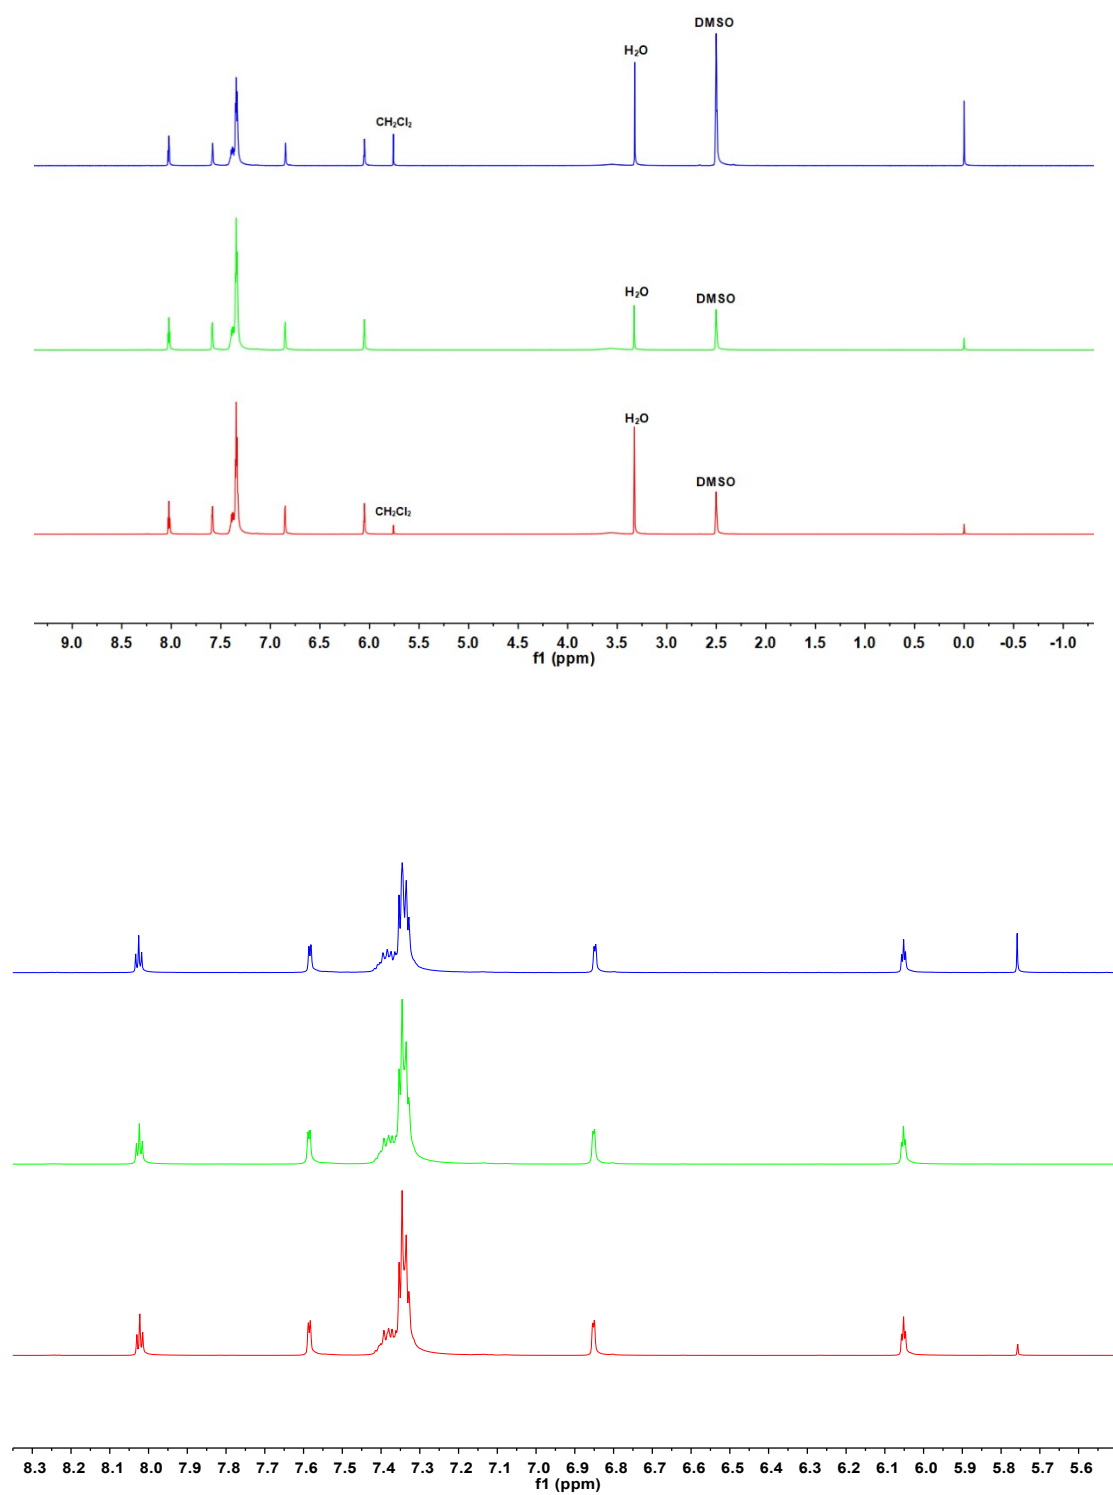

**Fig. S21.** <sup>1</sup>H NMR of **1B** (red), **1G** (green) and **1G-F1** (blue). The bottom picture is magnification of the 8.3 ppm-5.5 ppm area of the top picture.

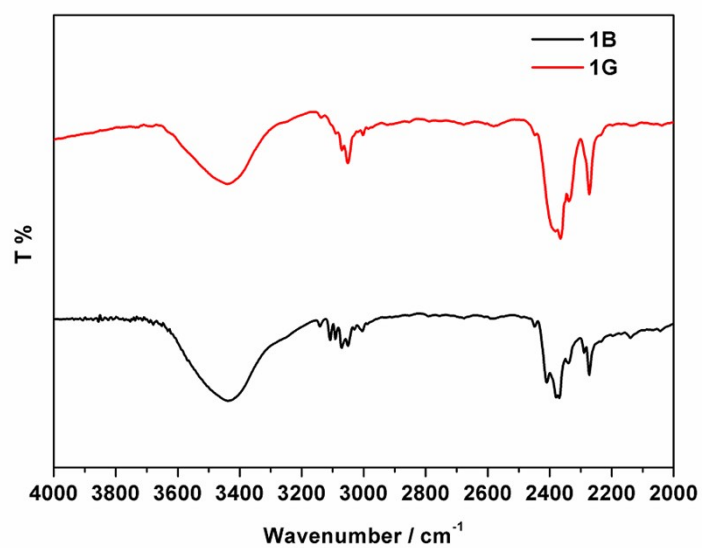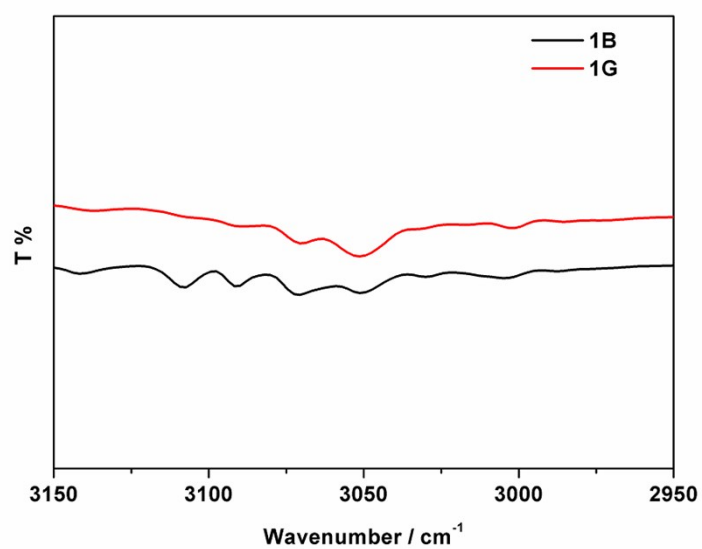

**Fig. S22.** Infrared spectra of **1B** and **1G**. The bottom picture is magnification of the 3150  $\text{cm}^{-1}$  – 2950  $\text{cm}^{-1}$  area of the top picture. In this area, the peak positions are not change, but some peaks almost disappeared after grinding.

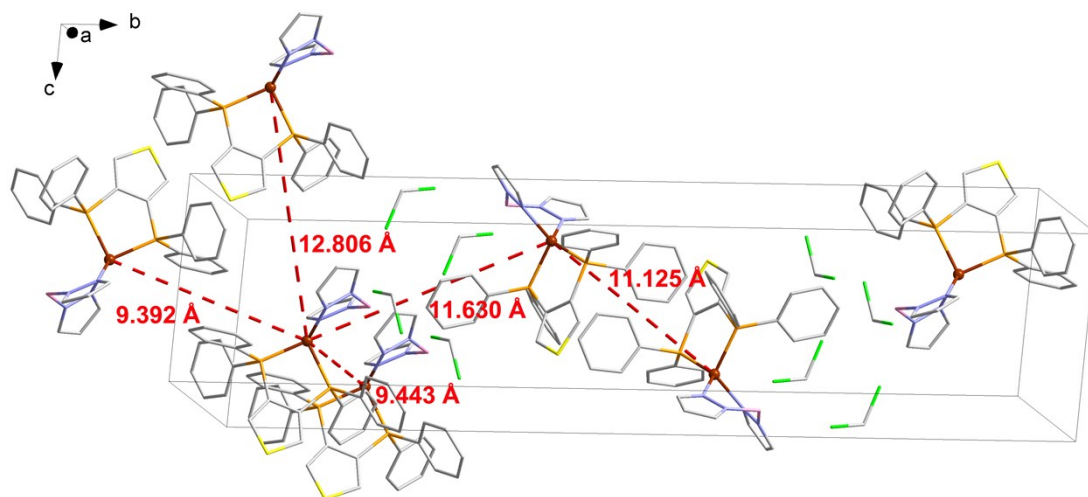

**Fig. S23.** The Cu-Cu distances in **1B**.

## Theoretical details

Coordinates of the optimized ground state  $S_0$  of complex **1**.

|    |             |             |             |
|----|-------------|-------------|-------------|
| Cu | 0.11960809  | 1.12878846  | 0.11645937  |
| P  | -1.81138764 | -0.22008312 | -0.12691391 |
| P  | 1.46189362  | -0.77953044 | -0.34879199 |
| S  | -0.90627858 | -3.84381836 | -2.35740469 |
| N  | 0.62093980  | 1.92628103  | 1.96921930  |
| N  | 1.50374493  | 2.94510774  | 1.96020915  |
| N  | 0.36812615  | 2.88856318  | -0.92852157 |
| N  | 1.27920338  | 3.75329086  | -0.43921174 |
| C  | 0.52501479  | -3.07324577 | -1.79917019 |
| H  | 1.49184487  | -3.46219550 | -2.08158699 |
| C  | 0.25737017  | -1.96502663 | -1.05517070 |
| C  | -3.25429352 | 0.17519592  | -1.19575299 |
| C  | -4.57800060 | 0.03383262  | -0.79040225 |
| H  | -4.80697027 | -0.34025792 | 0.20007597  |
| C  | -2.57644757 | -0.79141170 | 1.43707145  |
| C  | -1.89522200 | -2.66803781 | -1.59185940 |
| H  | -2.96892436 | -2.71091315 | -1.69913500 |
| C  | -2.98318966 | 0.19504825  | 2.33808784  |
| H  | -2.82649606 | 1.24173910  | 2.09839168  |
| C  | 2.14705307  | -1.62597884 | 1.12406911  |
| C  | 2.83603661  | -0.80455396 | -1.55823881 |
| C  | -2.75225059 | -2.13003385 | 1.77638671  |
| H  | -2.42874138 | -2.90836836 | 1.09595559  |
| C  | -1.15990347 | -1.72629241 | -0.93749646 |
| C  | 1.16897857  | 4.93091803  | -1.06729231 |
| H  | 1.82335263  | 5.74762879  | -0.80746910 |
| C  | 1.97564059  | -2.97940124 | 1.40482477  |
| H  | 1.39788493  | -3.60415226 | 0.73388417  |

|   |             |             |             |
|---|-------------|-------------|-------------|
| C | -2.98806367 | 0.66582304  | -2.47591019 |
| H | -1.96023433 | 0.78361258  | -2.80405015 |
| C | -3.74950094 | -1.49023282 | 3.87141170  |
| H | -4.20279874 | -1.76276670 | 4.81794969  |
| C | 1.63986846  | 3.43710211  | 3.19929964  |
| H | 2.31219229  | 4.25939094  | 3.38595370  |
| C | -3.33201234 | -2.47609600 | 2.99017954  |
| H | -3.45611869 | -3.52244961 | 3.24640348  |
| C | 0.20445974  | 1.78356166  | 3.22494596  |
| H | -0.51112725 | 1.01372984  | 3.47176206  |
| C | -3.57575505 | -0.15201637 | 3.54215785  |
| H | -3.89024763 | 0.62457557  | 4.23033443  |
| C | -5.61578010 | 0.37410073  | -1.65071964 |
| H | -6.64274444 | 0.26170890  | -1.32095616 |
| C | -5.34233199 | 0.85222805  | -2.92207301 |
| H | -6.15343577 | 1.11714347  | -3.59104729 |
| C | 2.88074650  | 0.22979730  | -2.49156462 |
| H | 2.14435794  | 1.02502832  | -2.44379849 |
| C | -0.31924838 | 3.53910343  | -1.86555269 |
| H | -1.12678824 | 3.04580401  | -2.38525480 |
| C | -4.02292447 | 0.99478166  | -3.33502311 |
| H | -3.80030251 | 1.37000894  | -4.32771245 |
| C | 3.82184775  | -1.79022150 | -1.58288050 |
| H | 3.82285876  | -2.57614292 | -0.83548937 |
| C | 0.15266244  | 4.84435869  | -2.00153153 |
| H | -0.19493140 | 5.61205728  | -2.67393010 |
| C | 0.82295079  | 2.72013451  | 4.05446145  |
| H | 0.69561021  | 2.85675964  | 5.11635946  |
| C | 2.53184311  | -3.53475036 | 2.54993974  |
| H | 2.38906249  | -4.58924817 | 2.76002324  |

|   |            |             |             |
|---|------------|-------------|-------------|
| C | 4.82088593 | -1.75500750 | -2.54466288 |
| H | 5.58725750 | -2.52238978 | -2.55415065 |
| C | 4.84629519 | -0.73403815 | -3.48565698 |
| H | 5.63117397 | -0.70541985 | -4.23349874 |
| C | 3.87834470 | 0.25944080  | -3.45563170 |
| H | 3.90779105 | 1.07116505  | -4.17378352 |
| C | 2.87262310 | -0.83279326 | 2.01560957  |
| H | 2.98584097 | 0.22868972  | 1.82441552  |
| C | 3.26525809 | -2.74408468 | 3.42190697  |
| H | 3.69847720 | -3.17856874 | 4.31618425  |
| C | 3.43414503 | -1.39230144 | 3.15241372  |
| H | 3.99396310 | -0.76506648 | 3.83685955  |
| B | 2.28690783 | 3.33536528  | 0.67031118  |
| H | 2.91656649 | 2.37526564  | 0.28771288  |
| H | 2.98461944 | 4.28512253  | 0.92586074  |

## Reference

- [1] Zhang, Q.; Wilson, P.; Li, Z.; McHale, R.; Godfrey, J.; Anastasaki, A.; Waldron, C.; Haddleton, D. M. Aqueous Copper-Mediated Living Polymerization: Exploiting Rapid Disproportionation of CuBr with Me<sub>6</sub>TREN. *J. Am. Chem. Soc.* **2013**, *135*, 7355-7363.
- [2] Dolomanov, O. V.; Bourhis, L. J.; Gildea, R. J.; Howard, J. A. K.; Puschmann, H. OLEX2: A Complete Structure Solution, Refinement and Analysis Program. *J. Appl. Cryst.* **2009**, *42*, 339-341.
- [3] Frisch, M. J.; Trucks, G. W.; Schlegel, H. B.; Scuseria, G. E.; Robb, M. A.; Cheeseman, J. R.; Scalmani, G.; Barone, V.; Mennucci, B.; Petersson, G. A.; Nakatsuji, H.; Caricato, M.; Li, X.; Hratchian, H. P.; Izmaylov, A. F.; Bloino, J.; Zheng, G.; Sonnenberg, J. L.; Hada, M.; Ehara, M.; Toyota, K.; Fukuda, R.; Hasegawa, J.; Ishida, M.; Nakajima, T.; Honda, Y.; Kitao, O.; Nakai, H.; Vreven, T.; Montgomery, J. A., Jr.; Peralta, J. E.; Ogliaro, F.; Bearpark, M.; Heyd, J. J.; Brothers, E.; Kudin, K. N.; Staroverov, V. N.; Kobayashi, R.; Normand, J.; Raghavachari, K.; Rendell, A.; Burant, J. C.; Iyengar, S. S.; Tomasi, J.; Cossi, M.; Rega, N.; Millam, J. M.; Klene, M.; Knox, J. E.; Cross, J. B.; Bakken, V.; Adamo, C.; Jaramillo, J.; Gomperts, R.; Stratmann, R. E.; Yazyev, O.; Austin, A. J.; Cammi, R.; Pomelli, C.; Ochterski, J. W.; Martin, R. L.; Morokuma, K.; Zakrzewski, V. G.; Voth, G. A.; Salvador, P.; Dannenberg, J. J.; Dapprich, S.; Daniels, A. D.; Farkas, O.; Foresman, J. B.; Ortiz, J. V.; Cioslowski, J.; Fox, D. J. *Gaussian 09, Revision D.01*; Gaussian, Inc.: Wallingford CT, **2013**.
- [4] Yanai, T.; Tew, D.; Handy, N. A New Hybrid Exchange–Correlation Functional Using the Coulomb-Attenuating Method (CAM-B3LYP). *Chem. Phys. Lett.* **2004**, *393*, 51-57.
- [5] Trofimenko, S. Boron-pyrazole chemistry. II. Poly(1-pyrazolyl)-borates. *J. Am. Chem. Soc.* **1967**, *89*, 3170-3177.
- [6] Clifton, J.; Habraken, E. R. M.; Pringle, P. G.; Manners, I. Subtle Effects of Ligand Backbone on the Efficiency of Iron-Diphos Catalysed Negishi Cross-Coupling Reactions. *Catal. Sci. Technol.* **2015**, *5*, 4350-4353.
- [7] Igawa, S.; Hashimoto, M.; Kawata, I.; Yashima, M.; Hoshino, M.; Osawa, M. Highly Efficient Green Organic Light-Emitting Diodes Containing Luminescent Tetrahedral Copper(I) Complexes. *J. Mater. Chem. C* **2013**, *1*, 542-551.
- [8] (a) Czerwieniec, R.; Yu, J.; Yersin, H. Blue-Light Emission of Cu(I) Complexes and Singlet Harvesting. *Inorg. Chem.* **2011**, *50*, 8293-8301; (b) Czerwieniec, R.; Yu, J.; Yersin, H. Correction to Blue-Light Emission of Cu(I) Complexes and Singlet Harvesting. *Inorg. Chem.* **2012**, *51*, 1975-1975.
